# Supplementary material
Source: PubMed Central journal article supplement (PMC9045575)
Supplement: AET2-6-e10737-s001.pdf [file AET2-6-e10737-s001.pdf]

## Social Care Practices Survey

This survey is part of a national project examining social care practices in pediatric emergency departments. Your participation is voluntary and you may stop at any time. It is expected to take 5 to 10 minutes to complete. All responses will be anonymous and data will only be shared in aggregate. You will be asked to generate an anonymized identifier to track changes on a follow up survey next year. Participation has minimal risk or benefit to the individual. Thank you for taking part!

**Instruction:** Please reflect and answer each item shown based on your experience in the pediatric emergency department of your training institution.

In this survey, the term “social needs” refers to social conditions associated with poor health with which patients and their families request assistance. “Social care” includes activities that address health-related social needs.

| SOCIAL NEEDS              |                                                  |
|---------------------------|--------------------------------------------------|
| Food insecurity           | Housing insecurity                               |
| Transportation            | Public benefits (Medicaid, WIC, SNAP, SSI, TANF) |
| Paying utilities          | Immigration/Legal assistance                     |
| Child services/Child care | Parent education/Job training                    |

**WIC:** Supplemental Nutrition Program for Women, Infants, and Children

**SNAP:** Supplemental Nutrition Assistance Program

**SSI:** Supplemental Security Income

**TANF:** Temporary Assistance for Needy Families

**1) Study ID** (2-digit number of day of birth + first 2 letters of mother’s maiden name. Ex: 27AB)

### 2) Clinical Position

- PEM Program Director or Associate Program Director
- PEM Fellow
- Prefer not to say
- Other: \_\_\_\_

### KNOWLEDGE

**3) In your emergency department (ED), is there a standardized workflow that ensures all or most patients/families are screened for social needs?**

Yes  No  I don't know

**4) Who in your ED screens for social needs? (select all that apply):**

Physician (Attending, Fellow, Resident)  Advanced Practice Provider (NP, PA)  
 Nurse  Health navigator (including undergrad/grad student)  Medical Assistant  
 Registrant  Social Worker  Electronically Self-Screened  Other\_\_\_\_   
I don't know  None

**5) Who in your ED do you believe is BEST POSITIONED to perform screening? (select all that apply):**

Physician (Attending, Fellow, Resident)  Advanced Practice Provider (NP, PA)  
 Nurse  Health navigator (including undergrad/grad student)  Medical Assistant  
 Registrant  Social Worker  Electronically Self-Screen  Other\_\_\_\_   
I don't know  None

**6) Who in your ED makes referrals to community resources for social needs? (select all that apply):**

Physician (Attending, Fellow, Resident)  Advanced Practice Provider (NP, PA)  
 Nurse  Health navigator (including undergrad/grad student)  Medical Assistant  
 Registrant  Social Worker  Automated Referral from Electronic Self-Screen  
 Other\_\_\_\_  I don't know  None

**7) Who in your ED do you believe is BEST POSITIONED to make referrals to community resources for social needs? (select all that apply):**

Physician (Attending, Fellow, Resident)  Advanced Practice Provider (NP, PA)  
 Nurse  Health navigator (including undergrad/grad student)  Medical Assistant  
 Registrant  Social Worker  Automated Referral from Electronic Self-Screen  
 Other\_\_\_\_  I don't know  None

**8a) Consider the last 5 shifts you worked in the ED. What percentage of patients/families did *you personally* screen for social needs?**

0%

- 1-25%
- 26-50%
- 51-75%
- 76-100%

**[for any answer over 0%]**

**8b) How often do you use a standardized screening tool for assessing the social needs of patients/families?**

- Never
- Sometimes
- Always

**[for answer sometimes or always]**

**8c) Which tool(s) do you use? (select all that apply):**

- An institution-specific tool
- AAFP
- AHC HRSN
- Arlington
- BMC-Thrive
- Health Leads
- HealthBegins
- iHELP
- PREPARE
- SEEK
- SWYC
- Two-item Food Insecurity Screen (Hunger Vital Sign™)
- WE CARE
- Other \_\_\_\_\_
- I don't know

**9) In your ED, are you able to have a social worker and/or navigator assist in providing social care at any time (24hrs/day, 7days/week)?**

- Yes
- No
- I don't know

**10a) For the following areas of need, do you know how to find local available options to refer patients/families on your own, WITHOUT the help of a social worker or navigator?**

- Housing insecurity  Yes  No
- Food insecurity  Yes  No
- Accessing public benefits  Yes  No
- Assistance paying utilities  Yes  No
- Transportation options  Yes  No
- Immigration assistance  Yes  No

**10b) Does your ED have a resource list to help refer patients/families to community or government social services?**

Yes  No  I don't know

**\*If yes:**

**10c) How often do you use the resource list when personally referring patients/families?**

Always  Sometimes  Never

**10d) Which resource list or referral platform does your program use?**

- An institution-specific list/platform
- HealthLeads
- 2-1-1
- Aunt Bertha
- CharityTracker
- CrossTx
- Healthify
- NowPow
- One Degree
- Pieces Iris
- TAVConnect
- Unite Us
- United Way
- Other\_\_\_\_\_

## **PERSPECTIVE**

**11) How comfortable do you feel asking patients and their families questions about their social needs?**

Very uncomfortable  Somewhat uncomfortable  Neutral  Comfortable  Very comfortable

**12) How important do you believe it is to provide social care to patients/families in the emergency setting?**

Not at all important  Somewhat important  Neutral  Important  Very important

**13) Why might you forgo asking patients/families questions about their social needs in the ED? (select all that apply):**

- Somebody else does this screening already
- My patients may not be interested
- I worry about patients/families feeling uncomfortable or stigmatized
- There is not enough time to conduct screening
- I do not feel well-trained to conduct screening
- It is not relevant to their ED visit
- I worry about jeopardizing the provider-patient relationship
- There are no community social services or resources available to address patients' needs
- Other

**14) What is the MOST IMPORTANT reason why you might forgo asking patients/families questions about their social needs in the ED? (select only ONE answer):**

- Somebody else does this screening already
- My patients may not be interested
- I worry about patients/families feeling uncomfortable or stigmatized
- There is not enough time to conduct screening
- I do not feel well-trained to conduct screening
- It is not relevant to their ED visit
- I worry about jeopardizing the provider-patient relationship
- There are no community social services or resources available to address patients' needs
- Other (your response to 'Other' in the preceding question)

### **SKILLS/TRAINING**

**15) How prepared do you feel to personally assist (i.e. without the help of a social worker/navigator) families whose social needs arise during their ED visit?**

- Very unprepared
- Unprepared
- Neither prepared nor unprepared
- Prepared
- Very prepared

**16a) Have you previously received training in social determinants of health?**

- Yes
- No
- I don't remember

**16b) If so, when? [select all that apply]**

- Medical School
- Residency
- Fellowship
- Faculty training
- Self-directed
- Other\_\_\_\_\_

**17a) Have you previously received training in screening and referral for social needs?**

- Yes  No  I don't remember

**17b) If so, when? [select all that apply]**

- Medical School
- Residency
- Fellowship
- Faculty training
- Self-directed
- Other\_\_\_\_\_

**EDUCATION IN SOCIAL CARE**

**18) In your opinion, how beneficial would education in social care be for fellowship training?**

- Not at all beneficial  Slightly beneficial  Moderately beneficial  Very beneficial  Extremely beneficial

**19) Which of the following social care training topics do you believe would be useful for PEM fellowship training? [select all that apply]**

- Evidence-based social care screening tools
- Local social care resources
- National social care resources
- Local social care challenges (common social needs specific to your area)
- Review of broad social care needs/challenges

Other

**20) Please indicate any social care training topics that would be of interest to you (select all that apply):**

- Access to a social care evidence and resource library
- Guide on how to document local existing resources (“asset mapping”)
- Communication skills primer on asking sensitive social needs questions
- Access to standardized pediatric social needs screeners
- Recommendations for alliance-building with community resources
- Model for integrating social care into clinical logistic flow
- Technical guide for building digital social needs screening/referral into electronic medical record
- Training guide for social care navigators (e.g. volunteers, community health workers, students)
- Funding options for startup and maintenance of social care services
- Translatable research network for implementation of social care practices in health care
- Other \_\_\_
- None of the above

## **DEMOGRAPHICS**

**21) Institution Region**

- West/Northwest
- Midwest/Central
- South/Southeast
- East/Northeast

**[FACULTY only]:**

**22) What education do your fellows currently receive during PEM fellowship training? [select all that apply]**

- Evidence-based social care screening tools
- Local social care resources
- National social care resources
- Local social care challenges (common social needs specific to your area)

- Review of broad social care needs/challenges
- Other
- None

**[FELLOW only]:**

**23a) What is your training background?:**  Pediatrics  Emergency medicine

**23b) Current year in fellowship training:**  1st year  2nd year  3rd year and beyond  Prefer not to say

**[FACULTY only]:**

**24) What is your clinical experience post-training?**

- Less than 5 years
- 5 to 10 years
- 11 to 15 years
- 16 to 20 years
- More than 20 years

**[FACULTY only]:**

**25) How long have you been employed in your current position at your institution?**

- Less than 1 year
- 1 to 2 years
- 3 to 5 years
- 5 to 10 years
- Greater than 10 years

**26) What is your age group?**

- 21 to 25 years
- 26 to 35 years
- 36 to 45 years
- 46 to 55 years
- 56 to 65 years
- 66 years and greater

**27) What is your gender?**



- Male (cis-gender male)
- Female (cis-gender female)
- Transgender Female/Trans Woman/MTF
- Transgender Male/Trans Man/FTM
- Non-binary
- Prefer to self-describe: \_\_\_\_\_
- Prefer not to say

**28) Which category best describes you? (select all that apply):**

- American Indian or Alaska Native
- Asian or Asian American
- Black or African American
- Hispanic or Latinx
- Middle Eastern or North African
- Native Hawaiian or Other Pacific Islander
- White
- Two or More Races
- Prefer not to say
